# Supplementary material for: Natural 6-hydroxy-chromanols and -chromenols: structural diversity, biosynthetic pathways and health implications
Source: Royal Society of Chemistry journal article supplement (doi:10.1039/c7ra11819h), 2018-01-01
Supplement: c7ra11819h1.pdf [file c7ra11819h1.pdf]

**Supplementary Table 1:** Physio-chemical properties of anti-inflammatory chromenols and chromanols.<sup>a</sup> Thresholds proposed by “Lipinski's Rule of Five” are given in brackets.

| Compound              | Molecular weight<br>[<500 Da] | Octanol-water partition coefficient<br>[<5 log <i>P</i> ] | Number of atoms [20-70] | Number of hydrogen bond acceptors (O and N atoms) [≤10] | Number of hydrogen bond donors (N-H and O-H bonds) [≤5] | Polar surface area [≤140 Å <sup>2</sup> ] | Number of rotatable bonds [≤10] | Number of violations | Lipinski's Rule <sup>b</sup> |
|-----------------------|-------------------------------|-----------------------------------------------------------|-------------------------|---------------------------------------------------------|---------------------------------------------------------|-------------------------------------------|---------------------------------|----------------------|------------------------------|
| δ-Sargachromenol (51) | 424.58                        | 7.44                                                      | 31                      | 4                                                       | 2                                                       | 66.76                                     | 10                              | 1                    | Y                            |
| Epitaondiol (79)      | 412.61                        | 6.36                                                      | 30                      | 3                                                       | 2                                                       | 49.69                                     | 0                               | 1                    | Y                            |
| δ-Garcionic acid (30) | 426.6                         | 7.59                                                      | 31                      | 4                                                       | 2                                                       | 66.76                                     | 10                              | 1                    | Y                            |
| 13'-α-COOH (205)      | 460.7                         | 8.37                                                      | 33                      | 4                                                       | 2                                                       | 66.76                                     | 13                              | 2                    | Y                            |
| 13'-α-OH (204)        | 446.7                         | 8.45                                                      | 32                      | 3                                                       | 2                                                       | 49.69                                     | 13                              | 2                    | Y                            |
| 13'-δ-OH (231)        | 418.66                        | 7.56                                                      | 30                      | 3                                                       | 2                                                       | 49.69                                     | 13                              | 2                    | Y                            |
| 13'-δ-COOH (229)      | 432.64                        | 7.43                                                      | 31                      | 4                                                       | 2                                                       | 66.76                                     | 13                              | 2                    | Y                            |

|                                  |       |      |    |   |   |       |   |   |   |
|----------------------------------|-------|------|----|---|---|-------|---|---|---|
| Sargachromanol<br>D/E<br>(57/58) | 428.6 | 6.89 | 31 | 4 | 3 | 69.92 | 9 | 1 | Y |
| Sargachromanol<br>G (60)         | 426.6 | 6.7  | 31 | 4 | 2 | 66.76 | 9 | 1 | Y |
| $\alpha$ -CMBHC (207)            | 320.4 | 4.86 | 23 | 4 | 2 | 66.76 | 5 | 0 | Y |

<sup>a</sup> Values were calculated by Molinspiration WebME editor version 1.16 (<http://www.molinspiration.com>).

<sup>b</sup> Y = passed the rule (max. 1 violation)
